# Supplementary material for: Case report: The first account of undifferentiated sarcoma with epithelioid features originating in the pleura
Source: Front Med (Lausanne). 2024 Feb 1;11:1301941. doi: 10.3389/fmed.2024.1301941 (PMC10867128; doi:10.3389/fmed.2024.1301941)
Supplement: Supplementary file 1 [file Table_1.XLSX]

## Sheet: Sheet1
Table S1: Mutation frequencies of Unclassified Sarcoma with Epithelioid Features
gene	mutation	Alteration	Variant Allele Fraction
NF1	p.R1241* Exon 28 nonsense mutation	c.3721C>T(p.R1241*)	0.3299
TP53	p.H214R Exon 6 missense mutation	c.641A>G(p.H214R)	0.4814
BRAF	p.D594G Exon 15 missense mutation	c.1781A>G(p.D594G)	0.378
ARID2	p.H764Y Exon 15 missense mutation	c.2290C>T(p.H764Y)	0.2271
BRCA1	BRCA1～IGR (upstream LGALS9) fusion	BRCA1:exon16~IGR (upstream LGALS9）	0.1498
CBL	p.R550W Exon 11 missense mutation	c.1648C>T(p.R550W)	0.1926
CYP2C19	p.M2711 Exon 5 missense mutation	c.813G>A(p.M2711)	0.1806
FLT1	p.L563F Exon 13 missense mutation	c.1689G>T(p.L563F)	0.2095
IRX2	p.P347S Exon 3 missense mutation	c.1039C>T(p.P347S)	0.3104
KIT	p.L462P Exon 9 missense mutation	c.1385T>C(p.L462P)	0.4476
MYH9	p.G1378A Exon 31 missense mutation	c.4133G>C(p.G1378A)	0.3571
PRKDC	p.R3246Q Exon 70 missense mutation	c.9737G>A(p.R3246Q)	0.177
THADA	p.D1746Y Exon 36 missense mutation	c.5236G>T (p.D1746Y)	0.3995
